# Supplementary material for: The Transcriptional Response to DNA-Double-Strand Breaks in Physcomitrella patens
Source: PubMed Central journal article supplement (PMC4990234; doi:10.1371/journal.pone.0161204), 2016-08-18
Supplement: pone.0161204.s003.pdf [file pone.0161204.s003.pdf]

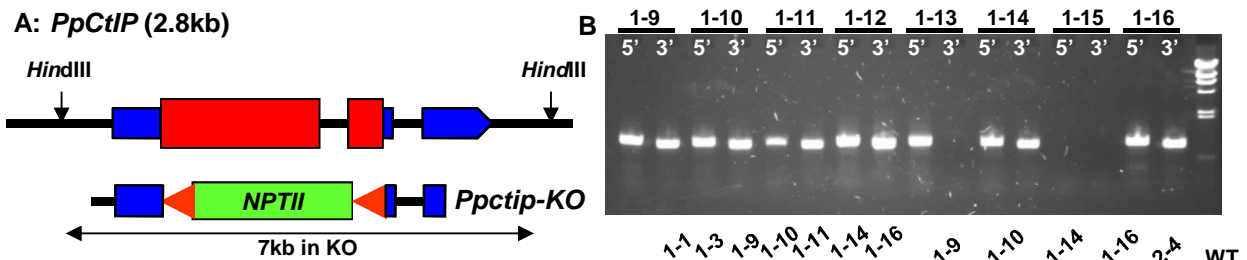

**S1 Fig: *Ppctip*-KO**

**A:** Schematic of gene structure and knockout construct.

**B:** Identification of targeted loci by PCR amplification with cassette-specific “outward” and gene-specific “inward” primers

**C:** Identification of single-copy targeted transformants with external gene-specific primers

**D:** Southern blot (*HindIII* digest) to identify transformants containing only a single, targeted selection cassette.

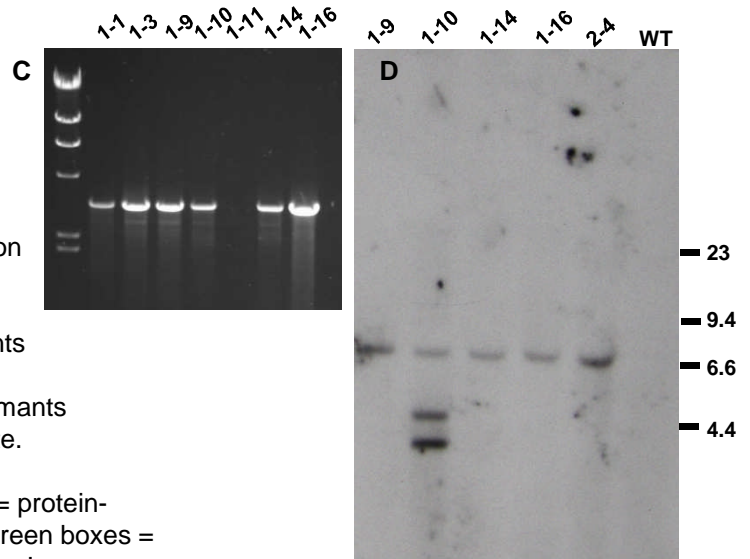

In Supporting Figures S1 Fig – S7 Fig, Red boxes = protein-coding sequence, Blue boxes = 5'- and 3'-UTRs, Green boxes = *NPTII* selection cassette, Red triangles = *LoxP* sites. In Southern blots, the *NPTII* sequence was used as a probe.
