# Supplementary material for: The Transcriptional Response to DNA-Double-Strand Breaks in Physcomitrella patens
Source: PubMed Central journal article supplement (PMC4990234; doi:10.1371/journal.pone.0161204), 2016-08-18
Supplement: pone.0161204.s012.pdf [file pone.0161204.s012.pdf]

**S1 Table:** Primers used to construct gene targeting vectors

| <b>Primer</b> | <b>Sequence</b>          | <b>Notes</b>                                          |
|---------------|--------------------------|-------------------------------------------------------|
| PpTeb_A4      | CGTGCAGCTTAAGACACAACCTGA | Amplification of 5'-targeting fragment                |
| PpTeb_S4      | GATAAACGGGTCCTGAAGCATGT  | Amplification of 3'-targeting fragment                |
| PpTeb_A5      | GGCAACATACTGTCCTCTTGACAC | Amplification of 3'- targeting fragment; external GSP |
| cPpTeb_S1     | TGGAAATTGTATGGTGCGTTCA   | Amplification of 5'- targeting fragment; external GSP |
| PpTeb_KOS     | GCTCTGCTTTCAGACACCGTAAG  | Amplification of knockout vector (PpTEB)              |
| PpTeb_KOA     | ACTCATGTTGTGGCAACCTTGAT  | Amplification of knockout vector (PpTEB)              |
| 80443_S4      | AGCTGATCCATGAGGACAGTCAC  | Amplification of 5'- targeting fragment; external GSP |
| 80443_A4      | TCCTCGCTCATCCCCATATCTTA  | Amplification of 5'-targeting fragment                |
| 80443_S5      | CAGTAAATCCCACCACTGAGCAC  | Amplification of 3'-targeting fragment                |
| 80443_A5      | TGGATGGCAAAACACTTACTTGG  | Amplification of 3'- targeting fragment; external GSP |
| 80443_KOS     | TTTGAAATGCCGAATAGCTTGTG  | Amplification of knockout vector (PpZRL)              |
| 80443_KOA     | TCCCCTTAATAGTGGCTCCATGT  | Amplification of knockout vector (PpZRL)              |
| 112245_S3     | AACCGAGACACCACAAATCTCCT  | Amplification of 5'- targeting fragment; external GSP |
| 112245_A3     | AAGCATTCCGTCCCTAACAAAAC  | Amplification of 5'-targeting fragment                |
| 112245_S4     | TGGAGTTCCACTAGGTTTTGTGCG | Amplification of 3'-targeting fragment                |
| QHel112245A   | TCGCTTCAAGAAAATGATGTGT   | Amplification of 3'- targeting fragment; external GSP |
| c112245_S1    | AATCGGGGAAGAATTTATGGTCA  | Amplification of knockout vector (PpRTEL1)            |
| c112245_A2    | CCAGCTCCATGAAAAGTGGTATG  | Amplification of knockout vector (PpRTEL1)            |
| 168107_S4     | CAAACCTCCACCACTTTTAAGCA  | Amplification of 5'- targeting fragment; external GSP |
| 167108_A4     | ACGTCTTCACTCGACAATTCAGC  | Amplification of 5'-targeting fragment                |
| SQHel168107F  | TGGGTCACATCTTCGATAATCA   | Amplification of 3'-targeting fragment                |
| 167108_A5     | TTCCATTGTTACCCCTCATCAAC  | Amplification of 3'- targeting fragment; external GSP |
| 168107_KOS    | CATGTCAGAAGAAAACCCCAAG   | Amplification of knockout                             |

|             |                          |                                                      |
|-------------|--------------------------|------------------------------------------------------|
|             |                          | vector (PpCHD5)                                      |
| QHel168107A | TGTAGGTAATAGCACGCTCCAT   | Amplification of knockout vector (PpCHD5)            |
| 10437_S1    | CACTATTGATAACCGAGCCAACG  | Amplification of 5'-targeting fragment; external GSP |
| 10437_A1    | CCAAATTCATCGCAGCTCAACTA  | Amplification of 5'-targeting fragment               |
| 10437_S2    | GAAAGGATCGCTGGAGTCAAAGT  | Amplification of 3'-targeting fragment               |
| 10437_A2    | AGCACCAAACCTCCTGCTTGATT  | Amplification of 3'-targeting fragment; external GSP |
| 10437_KOS   | CTGGTCAATCAAACCTCCACATC  | Amplification of knockout vector (PpERCC6)           |
| 10437_KOA   | GCAGTGAGGTTGGCAAACATTA   | Amplification of knockout vector (PpERCC6)           |
| 5'108610-F  | GGGTATTACTGCGGAGCTGAAG   | Amplification of 5'-targeting fragment; external GSP |
| 5'108610-R  | AGCCGCTTTGTATCGAGTGAAG   | Amplification of 5'-targeting fragment               |
| PpAlc1_S2   | CAGAATGATGGGTCACTGAAACC  | Amplification of 3'-targeting fragment               |
| QHel108610A | TTCATCATTTCAACTCCTGTCTG  | Amplification of 3'-targeting fragment; external GSP |
| Alc1_KOS    | TGTGGGTCGTA CTGTGGAAGTTT | Amplification of knockout vector (PpALC1)            |
| Alc1_KOA    | CCCAAATGTGACAGAAACAGCA   | Amplification of knockout vector (PpALC1)            |
| CtIP-S      | AACACAGTCTTCCATCCTCTGCAC | Amplification of CtIP gene; 5'-external GSP          |
| CtIP-A      | CTCCATACGCAAAGGAAGCAAT   | Amplification of CtIP gene; 3'-external GSP          |
| CtIP-KOS    | AAGGCACATAGCTCCACAAGCAT  | Amplification of knockout vector (PpCtIP)            |
| CtIP-KOA    | GACAAGCCGTCACCGTAACTACA  | Amplification of knockout vector (PpCtIP1)           |
