# Supplementary material for: The Transcriptional Response to DNA-Double-Strand Breaks in Physcomitrella patens
Source: PubMed Central journal article supplement (PMC4990234; doi:10.1371/journal.pone.0161204), 2016-08-18
Supplement: pone.0161204.s013.pdf [file pone.0161204.s013.pdf]

**S2 Table:** Primers used for real-time quantitative PCR.

| <b>Gene</b>     | <b>Primer sequence</b>   | <b>Notes</b> |
|-----------------|--------------------------|--------------|
| <i>PpRad51A</i> | CTGTTATTTGGCATCACCTTCA   | Forward      |
|                 | TTGACCAAGAACAGACAACCTGG  | Reverse      |
| <i>PpRad51B</i> | GCCTGTGACATTGTATTGGAGA   | Forward      |
|                 | GGTTGTACCATTACCCTCCTGA   | Reverse      |
| <i>PpKu70</i>   | ATCTTGGCAAATGAGGTCAAAG   | Forward      |
|                 | GCTCTCTGCTCAAACTCCAAT    | Reverse      |
| <i>PpKu80</i>   | GCTAACTTTTCATGGCCAACCTCT | Forward      |
|                 | TCTGGCCTTTGAAGTCTCTGAT   | Reverse      |
| <i>PpPARP-2</i> | AGAAGTGTTGCGTCCTGTTTTT   | Forward      |
|                 | ATGTCGGGGGTTCTATTTTCAGT  | Reverse      |
| <i>PpPARP-3</i> | GTTTCGGGTAGAAATGGTCAAA   | Forward      |
|                 | CCAGGATGCACTTATATGCTTG   | Reverse      |
| <i>PpSrs2</i>   | CATAGATCATCATTGGGTTTCG   | Forward      |
|                 | GAGCCTTGTTTGCTTTGGTTAC   | Reverse      |
| <i>PpAlc1</i>   | AGACAAATTCAAGCGTCTTGGT   | Forward      |
|                 | TTCATCATTTCAACTCCTGTTCG  | Reverse      |
| <i>PpCAP-50</i> | GCAACAGTAGTCGGTGTCTTCA   | Forward      |
|                 | TATCCGAAATAGGACACCTTGC   | Reverse      |
