# Supplementary material for: The Transcriptional Response to DNA-Double-Strand Breaks in Physcomitrella patens
Source: PubMed Central journal article supplement (PMC4990234; doi:10.1371/journal.pone.0161204), 2016-08-18
Supplement: pone.0161204.s014.pdf [file pone.0161204.s014.pdf]

**S3 Table:** Down-regulated genes that are up-regulated by drought-stress

| <b>Fold change</b> | <b>V3.3 ID</b>   | <b>Phypa1_1:ID and annotation</b>       |
|--------------------|------------------|-----------------------------------------|
| 3x                 | Pp3c13_6860V3.1  | 228680: Group 2 LEA protein             |
| 4x                 | Pp3c20_8030V3.1  | 228642: Unknown drought-induced protein |
| 4x                 | Pp3c12_22320V3.1 | 166566: Group 3 LEA protein             |
| 4x                 | Pp3c10_6760V3.1  | 228663: TspO-like protein               |
| 4x                 | Pp3c11_4920V3.1  | 228732: Unknown drought-induced protein |
| 4x                 | Pp3c21_4870V3.1  | 166706: Unknown drought-induced protein |
