# Supplementary material for: The Transcriptional Response to DNA-Double-Strand Breaks in Physcomitrella patens
Source: PubMed Central journal article supplement (PMC4990234; doi:10.1371/journal.pone.0161204), 2016-08-18
Supplement: pone.0161204.s015.pdf [file pone.0161204.s015.pdf]

**S4 Table:** Up-regulated genes annotated as transcription factors.

| <b>Fold change</b> | <b>V3.3 ID</b>   | <b>Phyap1_1:ID and annotation</b>           |
|--------------------|------------------|---------------------------------------------|
| n.c.               | Pp3c2_31770V3.1  | 61394: R2R3 Myb family transcription factor |
| 310x               | Pp3c23_5390V3.1  | 97669: Myb-like transcription factor        |
| 49x                | Pp3c7_20200V3.1  | 173967: AP2/EREBP transcription factor      |
| 42x                | Pp3c11_14690V3.1 | 159296: AP2/EREBP transcription factor      |
| 34x                | Pp3c6_26080V3.1  | 163201: AP2/EREBP transcription factor      |
| 27x                | Pp1s109_122V2.1  | 233888: WRKY transcription factor           |
| 17x                | Pp3c19_3000V3.1  | 234503: GATA transcription factor           |
| 14x                | Pp3c24_7690V3.1  | 233209: Myb-like transcription factor       |
| 13x                | Pp3c2_32530V3.1  | 49725: NAC/NAM transcription factor         |
| 12x                | Pp3c7_10780V3.1  | 165365: AP2/EREBP transcription factor      |
| 12x                | Pp3c7_20170V3.1  | 158560: AP2/EREBP transcription factor      |
| 11x                | Pp3c5_2900V3.1   | 128717: AP2/EREB transcription factor       |
| 9x                 | Pp3c14_21620V3.1 | 206659: HD- Zip transcription factor        |
| 8x                 | Pp3c13_2080V3.1  | 166279: bHLH family transcription factor    |
| 8x                 | Pp3c12_15190V3.1 | 164510: NAC/NAM transcription factor        |
| 7x                 | Pp3c17_23620V1.1 | 78012: Myb-like transcription factor        |
| 7x                 | Pp3c13_6470V3.1  | 168588: NAC/NAM transcription factor        |
| 7x                 | Pp3c2_25760V3.1  | 166576: AP2/EREBP transcription factor      |
| 6x                 | Pp3c23_9520V3.1  | 114556: NAC/NAM transcription factor        |
| 6x                 | Pp3c11_10350V3.1 | 235529: R2R3 Myb transcription factor       |
| 6x                 | Pp3c20_18130V3.1 | 208168: NAC/NAM transcription factor        |
| 6x                 | Pp3c13_24020V3.1 | 72578: Ap2/EREBP transcription factor       |
| 5x                 | Pp3c27_5180V3.1  | Unannotated Ap2/EREBP transcription factor  |
| 5x                 | Pp3c16_13260V3.1 | 176040: AP2/EREBP transcription factor      |
| 5x                 | Pp3c4_26880V3.1  | 19197: WRKY transcription factor            |
| 5x                 | Pp3c1_7800V3.1   | 207319: Ap2/EREBP transcription factor      |
| 4x                 | Pp3c2_26970V3.1  | 160508: bZIP transcription factor           |
| 4x                 | Pp3c1_41530V3.1  | 233952: Myb-like transcription factor       |
| 4x                 | Pp3c6_2730V3.1   | 184805: HD-Zip transcription factor         |
| 4x                 | Pp3c1_14230V3.1  | 233473: AP2/EREBP transcription factor      |
| 4x                 | Pp3c25_4250V3.1  | 198785: AP2/EREBP transcription factor      |
| 4x                 | Pp3c14_17020V3.1 | 124219: WRKY transcription factor           |
| 4x                 | Pp3c19_6370V3.1  | 149195: AP2/EREBP transcription factor      |
| 3x                 | Pp3c17_20210V3.1 | 77514: B3 family transcription factor       |
| 3x                 | Pp3c18_11980V3.1 | 64872: AP2/EREBP transcription factor       |
| 3x                 | Pp3c17_10170V3.1 | 19961: AP2/EREBP transcription factor       |
| 3x                 | Pp3c22_1790V3.1  | 87858: AP2/EREBP transcription factor       |
