# Supplementary material for: The Transcriptional Response to DNA-Double-Strand Breaks in Physcomitrella patens
Source: PubMed Central journal article supplement (PMC4990234; doi:10.1371/journal.pone.0161204), 2016-08-18
Supplement: pone.0161204.s016.pdf [file pone.0161204.s016.pdf]

**S5 Table:** Down-regulated genes annotated as transcription factors

| <b>Fold change</b> | <b>V3.3 ID</b>   | <b>Phypa1_1:ID and annotation</b>                                                  |
|--------------------|------------------|------------------------------------------------------------------------------------|
| 3x                 | Pp3c9_5650V3.1   | 226592: Histone-like transcription factor, CCAAT-binding factor, subunit C         |
| 3x                 | p3c23_6860V3.1   | 66431:NAC/NAM transcription factor                                                 |
| 3x                 | Pp3c4_11507V3.1  | 92601: NAC/ NAM transcription factor                                               |
| 3x                 | Pp3c4_11490V3.1  | 145456: NAC/NAM transcription factor                                               |
| 3x                 | Pp3c8_16910V3.1  | 166399: Myb family transcription factor                                            |
| 4x                 | Pp3c23_15540V3.1 | 110184: Transcription factor containing NAC, ubiquitin-associated and TS-N domains |
| 4x                 | Pp3c1_36120V3.1  | 70478: Ap2/EREBP transcription factor                                              |
| 4x                 | Pp3c16_19170V3.1 | 235399: MADS-domain transcription factor                                           |
| 4x                 | Pp3c21_11230V3.1 | 107983: NAC/NAM transcription factor                                               |
| 4x                 | Pp1s121_54V2.1   | 84228: bHLH transcription factor                                                   |
| 5x                 | Pp3c22_10770V3.1 | 183238: AP2/EREBP transcription factor                                             |
| 6x                 | Pp3c5_21370V3.1  | 92067: Myb family transcription factor                                             |
| 7x                 | Pp3c27_1350V3.1  | 228103:AP2/EREBP transcription factor                                              |
| 12x                | Pp3c16_3770V3.1  | 189022: Ap2/EREBP transcription factor.                                            |
